# Supplementary material for: Experience of decision-making for home breech birth: An interpretive description
Source: PubMed Central journal article supplement — SSM Qual Res Health. Author manuscript; Available in PMC 2024 Nov 12. (PMC11556396; doi:10.1016/j.ssmqr.2024.100397), 2024-02-16
Supplement: NIHMS2028991-supplement-Supplemental_Table_1__Interview_Guide.pdf [file NIHMS2028991-supplement-Supplemental_Table_1__Interview_Guide.pdf]

Supplemental Table 1: Interview Guide

| Topic                                          | Example Questions                                                                                                                                                                                                                                                                                                                       | Example Probes                                                                                                                                                                                                                                                                                                       |
|------------------------------------------------|-----------------------------------------------------------------------------------------------------------------------------------------------------------------------------------------------------------------------------------------------------------------------------------------------------------------------------------------|----------------------------------------------------------------------------------------------------------------------------------------------------------------------------------------------------------------------------------------------------------------------------------------------------------------------|
| <b>General narrative</b>                       | <p>Tell me more about your experience and how you made this decision.</p> <p>In the survey, you said [unclear/unique survey response]. Can you help me understand that better?</p>                                                                                                                                                      | <p>What was that like for you?</p> <p>How did you feel?</p> <p>What were you thinking?</p> <p>What happened then?</p>                                                                                                                                                                                                |
| <b>Considerations</b>                          | <p>What was important to you in making this decision?</p>                                                                                                                                                                                                                                                                               | <p>What does that mean to you; can you give me an example?</p> <p>How did you make this decision?</p>                                                                                                                                                                                                                |
| <b>Influential factors</b>                     | <p>What led you to this decision?</p> <p>What role, if any, did your personal or community beliefs play in your decision-making?</p>                                                                                                                                                                                                    | <p>What people or sources of information do you think influenced your decision?</p> <p>How did your family, friends, or community, react to this decision?</p>                                                                                                                                                       |
| <b>Interactions with health care providers</b> | <p>Can you describe any interactions you had with your health care provider in making this decision?</p> <p>In an ideal world, what would that experience have looked like?</p> <p>Is there anything that could have happened in your discussions with your health care provider that would have led you make a different decision?</p> | <p>How did your provider respond?</p> <p>How did that interaction affect your decision?</p> <p>How did you feel about that interaction?</p> <p>How was that experience different from what you expected would happen?</p> <p>How was that interaction different than the one you had with your [other provider]?</p> |
| <b>Perception of risk and benefits</b>         | <p>What did you see as the risks and benefits?</p>                                                                                                                                                                                                                                                                                      | <p>Why did/didn't you feel that home/hospital/cesarean/unassisted birth was best for you?</p> <p>What do you think you were prioritizing at that time?</p>                                                                                                                                                           |
| <b>Reflections</b>                             | <p>Looking back, how do you feel about your decision?</p>                                                                                                                                                                                                                                                                               | <p>If you had gone through this experience knowing what you know now, would it have been different? If so, how?</p>                                                                                                                                                                                                  |

---

| <b>Topic</b>      | <b>Example Questions</b>                                                                                                                                                                                                            | <b>Example Probes</b>                                                                                                                                                                                                                                             |
|-------------------|-------------------------------------------------------------------------------------------------------------------------------------------------------------------------------------------------------------------------------------|-------------------------------------------------------------------------------------------------------------------------------------------------------------------------------------------------------------------------------------------------------------------|
|                   | <p>What advice would you give to someone else in that situation?</p> <p>Do you think this experience of decision-making affected you in other aspects of your life? If so, how?</p>                                                 |                                                                                                                                                                                                                                                                   |
| <b>Conclusion</b> | <p>Recognizing that the goal of this research is to better understand the experience of decision-making, what do you think is the most important thing for us to understand?</p> <p>Is there anything else you'd like to share?</p> | <p>Why did you decide to participate in this study?</p> <p>If there was one main take-away message you wanted to make sure I heard from your story, what would it be?</p> <p>What do you think researchers and clinicians need to know about this experience?</p> |

---
